# Supplementary material for: Arabidopsis TRB proteins function in H3K4me3 demethylation by recruiting JMJ14
Source: PubMed Central journal article supplement (PMC10049986; doi:10.1038/s41467-023-37263-9), 2023-03-28
Supplement: 41467_2023_37263_MOESM3_ESM.pdf [file 41467_2023_37263_MOESM3_ESM.pdf]

## **Description of Additional Supplementary Files:**

**Supplementary Dataset 1:** FLAG-TRBs IP-MS data.

**Supplementary Dataset 2:** Diff-H3K4me3 and H3K27me3 regions in trb1/2/3 and jmj14-1 mutants versus Col-0.

**Supplementary Dataset 3:** The list of TRB1 and JMJ14 co-bound genes.

**Supplementary Dataset 4:** The H3K4me3 and H3K27me3 levels of TRB1- JMJ14 co-bound genes in trb1/2/3 mutant vs Col-0. 5)

**Supplementary Dataset 5:** The DEG list of trb1/2/3 and jmj14-1 mutants.

**Supplementary Dataset 6:** List of primers.
