# Supplementary material for: Arabidopsis TRB proteins function in H3K4me3 demethylation by recruiting JMJ14
Source: PubMed Central journal article supplement (PMC10049986; doi:10.1038/s41467-023-37263-9), 2023-03-28
Supplement: 41467_2023_37263_MOESM10_ESM.pdf [file 41467_2023_37263_MOESM10_ESM.pdf]

## Reporting Summary

Nature Portfolio wishes to improve the reproducibility of the work that we publish. This form provides structure for consistency and transparency in reporting. For further information on Nature Portfolio policies, see our [Editorial Policies](#) and the [Editorial Policy Checklist](#).

### Statistics

For all statistical analyses, confirm that the following items are present in the figure legend, table legend, main text, or Methods section.

n/a Confirmed

- The exact sample size ( $n$ ) for each experimental group/condition, given as a discrete number and unit of measurement
- A statement on whether measurements were taken from distinct samples or whether the same sample was measured repeatedly
- The statistical test(s) used AND whether they are one- or two-sided  
*Only common tests should be described solely by name; describe more complex techniques in the Methods section.*
- A description of all covariates tested
- A description of any assumptions or corrections, such as tests of normality and adjustment for multiple comparisons
- A full description of the statistical parameters including central tendency (e.g. means) or other basic estimates (e.g. regression coefficient) AND variation (e.g. standard deviation) or associated estimates of uncertainty (e.g. confidence intervals)
- For null hypothesis testing, the test statistic (e.g.  $F$ ,  $t$ ,  $r$ ) with confidence intervals, effect sizes, degrees of freedom and  $P$  value noted  
*Give  $P$  values as exact values whenever suitable.*
- For Bayesian analysis, information on the choice of priors and Markov chain Monte Carlo settings
- For hierarchical and complex designs, identification of the appropriate level for tests and full reporting of outcomes
- Estimates of effect sizes (e.g. Cohen's  $d$ , Pearson's  $r$ ), indicating how they were calculated

*Our web collection on [statistics for biologists](#) contains articles on many of the points above.*

### Software and code

Policy information about [availability of computer code](#)

|                 |                                                                                                                                                                                                                                                                                                                                                                                                                                                                                                                                                                                                                                                                                                                                                                                                                                                                                                                                                                                                                                                                                                                                                                                                                                                                                                                                                                                                                                                                                                                                                                                                                                                                                                                                                                                                                                                                                                                                                                                                                                                                                                                                |
|-----------------|--------------------------------------------------------------------------------------------------------------------------------------------------------------------------------------------------------------------------------------------------------------------------------------------------------------------------------------------------------------------------------------------------------------------------------------------------------------------------------------------------------------------------------------------------------------------------------------------------------------------------------------------------------------------------------------------------------------------------------------------------------------------------------------------------------------------------------------------------------------------------------------------------------------------------------------------------------------------------------------------------------------------------------------------------------------------------------------------------------------------------------------------------------------------------------------------------------------------------------------------------------------------------------------------------------------------------------------------------------------------------------------------------------------------------------------------------------------------------------------------------------------------------------------------------------------------------------------------------------------------------------------------------------------------------------------------------------------------------------------------------------------------------------------------------------------------------------------------------------------------------------------------------------------------------------------------------------------------------------------------------------------------------------------------------------------------------------------------------------------------------------|
| Data collection | No software was used for data collection.                                                                                                                                                                                                                                                                                                                                                                                                                                                                                                                                                                                                                                                                                                                                                                                                                                                                                                                                                                                                                                                                                                                                                                                                                                                                                                                                                                                                                                                                                                                                                                                                                                                                                                                                                                                                                                                                                                                                                                                                                                                                                      |
| Data analysis   | <p>RNA-seq analysis</p> <p>Cleaned short reads were aligned to reference genome tair10 by Bowtie2 (v2.1.0), and expression abundance was calculated by RSEM with default parameters. Heatmaps were visualized with the R package pheatmap. To reduce false positive of differential expression, transcripts with less than 5 reads of all replicates in total were regarded as lowly expressed genes and have been removed in subsequent analysis. Differential expression analysis was conducted using edgeR. A threshold of p value &lt; 0.05 and Fold Change &gt; 2 were used to decide whether significant expression difference exists between samples.</p> <p>ChIP-seq analysis</p> <p>ChIP-seq fastq reads were aligned to the TAIR10 reference genome with Bowtie (v1.1.2), allowing only uniquely mapping reads with 0 mismatches. Duplicated reads were removed by Samtools. ChIP-seq peaks were called by MACS2 (v2.1.1) and annotated with ChIPseeker. Differential peaks were called by bdgdiff function in MACS2. ChIP-seq data metaplots were plotted by deeptools (v2.5.1). For Pol II 5' occupancy analysis, Pol II occupancy was calculated based normalized reads count (RPKM) on a TSS +/- 200 bp region and a TSS +500 bp to TTS gene body region by bedtools. Detailed information for published ChIP-seq datasets is listed in Supplementary Table 2.</p> <p>Whole genome bisulfite sequencing (BS-seq) analysis</p> <p>Trim_galore (<a href="http://www.bioinformatics.babraham.ac.uk/projects/trim_galore/">http://www.bioinformatics.babraham.ac.uk/projects/trim_galore/</a>) was used to trim adapters after filtering low quality reads. BS-seq reads were aligned to TAIR10 reference genome by Bismark (v0.18.2) with default settings. Reads with three or more consecutive CHH sites were considered as unconverted reads and filtered. DNA methylation levels were defined as #C/ (#C + #T). DMRs (Differentially Methylated Regions) were called by DMRcaller with p &lt; 0.01 for where the differences in CG, CHG, and CHH methylation were at least 0.4, 0.2, and 0.1, respectively.</p> |

**BS-PCR analysis**

BS-PCR data were trimmed with primer sequences and mapped to TAIR10 reference genome with bsmmap (v2.90) allowing 2 mismatches and 1 best hit (-v 2 -w 1).

For manuscripts utilizing custom algorithms or software that are central to the research but not yet described in published literature, software must be made available to editors and reviewers. We strongly encourage code deposition in a community repository (e.g. GitHub). See the Nature Portfolio [guidelines for submitting code & software](#) for further information.

## Data

Policy information about [availability of data](#)

All manuscripts must include a [data availability statement](#). This statement should provide the following information, where applicable:

- Accession codes, unique identifiers, or web links for publicly available datasets
- A description of any restrictions on data availability
- For clinical datasets or third party data, please ensure that the statement adheres to our [policy](#)

All high-throughput sequencing data generated in this study are accessible at NCBI's Gene Expression Omnibus (GEO) via GEO Series accession number GSE204681 (<https://www.ncbi.nlm.nih.gov/geo/query/acc.cgi?acc=GSE204681>). The mass spectrometry proteomics data have been deposited to the ProteomeXchange Consortium via the MassIVE partner repository, and the accession number is MSV000091349 ([https://massive.ucsd.edu/ProteoSAFe/dataset\\_files.jsp?task=5003a58b4c39487d8bd2b0e508388a4c#%7B%22table\\_sort\\_history%22%3A%22main.collection\\_asc%22%7D](https://massive.ucsd.edu/ProteoSAFe/dataset_files.jsp?task=5003a58b4c39487d8bd2b0e508388a4c#%7B%22table_sort_history%22%3A%22main.collection_asc%22%7D)).

## Field-specific reporting

Please select the one below that is the best fit for your research. If you are not sure, read the appropriate sections before making your selection.

- Life sciences       Behavioural & social sciences       Ecological, evolutionary & environmental sciences

For a reference copy of the document with all sections, see [nature.com/documents/nr-reporting-summary-flat.pdf](https://www.nature.com/documents/nr-reporting-summary-flat.pdf)

## Life sciences study design

All studies must disclose on these points even when the disclosure is negative.

|                 |                                                                                                                             |
|-----------------|-----------------------------------------------------------------------------------------------------------------------------|
| Sample size     | No sample size calculation was performed.                                                                                   |
| Data exclusions | No data exclusion in the study.                                                                                             |
| Replication     | Two replicates for ChIP-seq. Three replicates for RNA-seq samples. Two replicates for WGBS data. Two replicates for BS-PCR. |
| Randomization   | For all experiments, treatment and control samples were grown side by side, each replicate on separate plate.               |
| Blinding        | No blinding used.                                                                                                           |

## Reporting for specific materials, systems and methods

We require information from authors about some types of materials, experimental systems and methods used in many studies. Here, indicate whether each material, system or method listed is relevant to your study. If you are not sure if a list item applies to your research, read the appropriate section before selecting a response.

### Materials & experimental systems

| n/a                                 | Involvement in the study                               |
|-------------------------------------|--------------------------------------------------------|
| <input type="checkbox"/>            | <input checked="" type="checkbox"/> Antibodies         |
| <input checked="" type="checkbox"/> | <input type="checkbox"/> Eukaryotic cell lines         |
| <input checked="" type="checkbox"/> | <input type="checkbox"/> Palaeontology and archaeology |
| <input checked="" type="checkbox"/> | <input type="checkbox"/> Animals and other organisms   |
| <input checked="" type="checkbox"/> | <input type="checkbox"/> Human research participants   |
| <input checked="" type="checkbox"/> | <input type="checkbox"/> Clinical data                 |
| <input checked="" type="checkbox"/> | <input type="checkbox"/> Dual use research of concern  |

### Methods

| n/a                                 | Involvement in the study                        |
|-------------------------------------|-------------------------------------------------|
| <input type="checkbox"/>            | <input checked="" type="checkbox"/> ChIP-seq    |
| <input checked="" type="checkbox"/> | <input type="checkbox"/> Flow cytometry         |
| <input checked="" type="checkbox"/> | <input type="checkbox"/> MRI-based neuroimaging |

## Antibodies

Antibodies used

Anti-H3K27me3 (Millipore Sigma)  
Anti-H3 (Abcam)

Anti-H3K4me3 (Millipore Sigma)  
 Anti-FLAG M2 (Sigma)  
 Anti-Myc (Cell Signaling)

## Validation

anti-FLAG M2 (Sigma): The antibody is validated by <https://www.sigmaaldrich.com/catalog/product/sigma/f1804>  
 anti-H3 (Ab1791, Abcam): The antibody is validated by <https://www.abcam.com/histone-h3-antibody-nuclear-marker-and-chip-grade-ab1791.html>  
 Anti-H3K27me3 (Millipore Sigma): The antibody is validated by [https://www.emdmillipore.com/US/en/product/Anti-trimethyl-Histone-H3-Lys27-Antibody,MM\\_NF-07-449](https://www.emdmillipore.com/US/en/product/Anti-trimethyl-Histone-H3-Lys27-Antibody,MM_NF-07-449)  
 Anti-H3K4me3 (Millipore Sigma): The antibody is validated by [https://www.emdmillipore.com/US/en/product/Anti-trimethyl-Histone-H3-Lys4-Antibody,MM\\_NF-07-473](https://www.emdmillipore.com/US/en/product/Anti-trimethyl-Histone-H3-Lys4-Antibody,MM_NF-07-473)  
 Anti-Myc (Cell Signaling): The antibody is validated by <https://www.cellsignal.com/products/primary-antibodies/myc-tag-9b11-mouse-mab/2276>

## ChIP-seq

## Data deposition

- Confirm that both raw and final processed data have been deposited in a public database such as [GEO](#).
- Confirm that you have deposited or provided access to graph files (e.g. BED files) for the called peaks.

## Data access links

*May remain private before publication.*

All high-throughput sequencing data generated in this study are accessible at NCBI's Gene Expression Omnibus (GEO) via GEO Series accession number GSE204681(<https://www.ncbi.nlm.nih.gov/geo/query/acc.cgi?acc=GSE204681>).

## Files in database submission

RNAseq-fwa-Rep1.bw  
 RNAseq-fwa-Rep2.bw  
 RNAseq-fwa-Rep3.bw  
 RNAseq-TRB1-ZF-Rep1.bw  
 RNAseq-TRB1-ZF-Rep2.bw  
 RNAseq-TRB2-ZF-Rep1.bw  
 RNAseq-TRB2-ZF-Rep2.bw  
 RNAseq-TRB2-ZF-Rep3.bw  
 RNAseq-TRB3-ZF-Rep1.bw  
 RNAseq-TRB3-ZF-Rep2.bw  
 RNAseq-TRB3-ZF-Rep3.bw  
 RNAseq-Col0-Rep1.bw  
 RNAseq-Col0-Rep2.bw  
 RNAseq-Col0-Rep3.bw  
 RNAseq-jmj14-Rep1.bw  
 RNAseq-jmj14-Rep2.bw  
 RNAseq-jmj14-Rep3.bw  
 RNAseq-trb123-Rep1.bw  
 RNAseq-trb123-Rep2.bw  
 RNAseq-trb123-Rep3.bw  
 H3-ChIPseq-Col0-Rep2\_S17\_L002.bw  
 H3-ChIPseq-trb123-Rep2\_S16\_L002.bw  
 H3K4me3-ChIPseq-Col0-Rep2\_S20\_L002.bw  
 H3K4me3-ChIPseq-trb123-Rep2\_S19\_L002.bw  
 H3-ChIPseq-jmj14-Rep1.bw  
 H3K4me3-ChIPseq-Col0-Rep1.bw  
 H3K4me3-ChIPseq-jmj14-Rep1.bw  
 H3K4me3-ChIPseq-trb123-Rep1.bw  
 FLAG-ChIPseq-Col0-Rep1.bw  
 FLAG-ChIPseq-Col0-Rep2.bw  
 FLAG-ChIPseq-JMJ14-Rep1.bw  
 FLAG-ChIPseq-JMJ14-Rep2.bw  
 H3-ChIPseq-Col0-Rep1.bw  
 H3-ChIPseq-Col0-Rep2.bw  
 H3-ChIPseq-trb123-Rep1.bw  
 H3-ChIPseq-trb123-Rep2.bw  
 H3K27me3-ChIPseq-Col0-Rep1.bw  
 H3K27me3-ChIPseq-Col0-Rep2.bw  
 H3K27me3-ChIPseq-trb123-Rep1.bw  
 H3K27me3-ChIPseq-trb123-Rep2.bw  
 FLAG-ChIPseq-TRB1-Rep1.bw  
 FLAG-ChIPseq-TRB1-Rep2.bw  
 FLAG-ChIPseq-TRB2-Rep1.bw  
 FLAG-ChIPseq-TRB2-Rep2.bw

FLAG-ChIPseq-TRB3-Rep1.bw  
FLAG-ChIPseq-TRB3-Rep2.bw  
H3-ChIPseq-fwa-Rep2.bw  
H3-ChIPseq-TRB1-ZF-Rep2.bw  
H3-ChIPseq-TRB2-ZF-Rep2.bw  
H3-ChIPseq-TRB3-ZF-Rep2.bw  
H3K27me3-ChIPseq-fwa-Rep2.bw  
H3K27me3-ChIPseq-TRB1-ZF-Rep2.bw  
H3K27me3-ChIPseq-TRB2-ZF-Rep2.bw  
H3K27me3-ChIPseq-TRB3-ZF-Rep2.bw  
H3K4me3-ChIPseq-fwa-Rep2.bw  
H3K4me3-ChIPseq-TRB1-ZF-Rep2.bw  
H3K4me3-ChIPseq-TRB2-ZF-Rep2.bw  
H3K4me3-ChIPseq-TRB3-ZF-Rep2.bw  
H3-ChIPseq-fwa-Rep1.bw  
H3-ChIPseq-fwa-Rep3.bw  
H3-ChIPseq-TRB1-ZF-Rep1.bw  
H3-ChIPseq-TRB1-ZF-Rep3.bw  
H3\_TRB2\_ZF.bw  
H3\_TRB3\_ZF.bw  
H3K27me3-ChIPseq-fwa-Rep1.bw  
H3K27me3-ChIPseq-TRB1-ZF-Rep1.bw  
H3K27me3-ChIPseq-TRB2-ZF-Rep1.bw  
H3K27me3-ChIPseq-TRB3-ZF-Rep1.bw  
H3K4me3-ChIPseq-fwa-Rep1.bw  
H3K4me3-ChIPseq-fwa-Rep3.bw  
H3K4me3-ChIPseq-TRB1-ZF-Rep1.bw  
H3K4me3-ChIPseq-TRB1-ZF-Rep3.bw  
H3K4me3-ChIPseq-TRB2-ZF-Rep1.bw  
H3K4me3-ChIPseq-TRB3-ZF-Rep1.bw  
FLAG-Col-0-Rep3.bw  
FLAG-Col-0-Rep4.bw  
FLAG-TRB1-rep3.bw  
FLAG-TRB1-rep4.bw  
FLAG-TRB2-rep3.bw  
FLAG-TRB2-rep4.bw  
FLAG-TRB3-rep3.bw  
FLAG-TRB3-rep4.bw  
MYC-Col-0\_S13\_L003.bw  
MYC-JMJ14-ZF-TRB1\_S15\_L003.bw  
MYC-JMJ14-ZF-TRB1\_S18\_L003.bw  
MYC-JMJ14-ZF-TRB2\_S16\_L003.bw  
MYC-JMJ14-ZF-TRB3\_S17\_L003.bw  
MYC-JMJ14\_S14\_L003.bw  
input-Col-0\_S23\_L003.bw  
input-JMJ14-ZF-TRB1\_S25\_L003.bw  
input-JMJ14-ZF-TRB1\_S28\_L003.bw  
input-JMJ14-ZF-TRB2\_S26\_L003.bw  
input-JMJ14-ZF-TRB3\_S27\_L003.bw  
input-JMJ14\_S24\_L003.bw  
FLAG-TRB1-rep3\_peaks.narrowPeak  
FLAG-TRB1-rep4\_peaks.narrowPeak  
FLAG-TRB2-rep3\_peaks.narrowPeak  
FLAG-TRB2-rep4\_peaks.narrowPeak  
FLAG-TRB3-rep3\_peaks.narrowPeak  
FLAG-TRB3-rep4\_peaks.narrowPeak  
MYC-JMJ14-ZF-TRB1\_S15\_L003\_peaks.narrowPeak  
MYC-JMJ14-ZF-TRB1\_S18\_L003\_peaks.narrowPeak  
MYC-JMJ14-ZF-TRB2\_S16\_L003\_peaks.narrowPeak  
MYC-JMJ14-ZF-TRB3\_S17\_L003\_peaks.narrowPeak  
MYC-JMJ14\_S14\_L003\_peaks.narrowPeak  
H3K4me3-ChIPseq-Col0-Rep2\_peaks.narrowPeak  
H3K4me3-ChIPseq-trb123-Rep2\_peaks.narrowPeak  
H3K4me3-ChIPseq-Col0-Rep1\_peaks.narrowPeak  
H3K4me3-ChIPseq-jmj14-Rep1\_peaks.narrowPeak  
H3K4me3-ChIPseq-trb123-Rep1\_peaks.narrowPeak  
FLAG-ChIPseq-JMJ14-Rep1\_peaks.narrowPeak  
FLAG-ChIPseq-JMJ14-Rep2\_peaks.narrowPeak

H3K27me3-ChIPseq-Col0-Rep1\_peaks.narrowPeak  
H3K27me3-ChIPseq-Col0-Rep2\_peaks.narrowPeak  
H3K27me3-ChIPseq-trb123-Rep1\_peaks.narrowPeak  
H3K27me3-ChIPseq-trb123-Rep2\_peaks.narrowPeak  
FLAG-ChIPseq-TRB1-Rep1\_peaks.narrowPeak  
FLAG-ChIPseq-TRB1-Rep2\_peaks.narrowPeak  
FLAG-ChIPseq-TRB2-Rep1\_peaks.narrowPeak  
FLAG-ChIPseq-TRB2-Rep2\_peaks.narrowPeak  
FLAG-ChIPseq-TRB3-Rep1\_peaks.narrowPeak  
FLAG-ChIPseq-TRB3-Rep2\_peaks.narrowPeak  
H3K27me3-ChIPseq-fwa-Rep2\_peaks.narrowPeak  
H3K27me3-ChIPseq-TRB1-ZF-Rep2\_peaks.narrowPeak  
H3K27me3-ChIPseq-TRB2-ZF-Rep2\_peaks.narrowPeak  
H3K27me3-ChIPseq-TRB3-ZF-Rep2\_peaks.narrowPeak  
H3K4me3-ChIPseq-fwa-Rep2\_peaks.narrowPeak  
H3K4me3-ChIPseq-TRB1-ZF-Rep2\_peaks.narrowPeak  
H3K4me3-ChIPseq-TRB2-ZF-Rep2\_peaks.narrowPeak  
H3K4me3-ChIPseq-TRB3-ZF-Rep2\_peaks.narrowPeak  
H3K27me3-ChIPseq-fwa-Rep1\_peaks.narrowPeak  
H3K27me3-ChIPseq-TRB1-ZF-Rep1\_peaks.narrowPeak  
H3K27me3-ChIPseq-TRB2-ZF-Rep1\_peaks.narrowPeak  
H3K27me3-ChIPseq-TRB3-ZF-Rep1\_peaks.narrowPeak  
H3K4me3-ChIPseq-fwa-Rep1\_peaks.narrowPeak  
H3K4me3-ChIPseq-fwa-Rep3\_peaks.narrowPeak  
H3K4me3-ChIPseq-TRB1-ZF-Rep1\_peaks.narrowPeak  
H3K4me3-ChIPseq-TRB1-ZF-Rep3\_peaks.narrowPeak  
H3K4me3-ChIPseq-TRB2-ZF-Rep1\_peaks.narrowPeak  
H3K4me3-ChIPseq-TRB3-ZF-Rep1\_peaks.narrowPeak  
WGBS-Col0-Rep1\_CG.wig  
WGBS-Col0-Rep2\_CG.wig  
WGBS-trb123-Rep1\_CG.wig  
WGBS-trb123-Rep2\_CG.wig  
WGBS-Col0-Rep1\_CHG.wig  
WGBS-Col0-Rep2\_CHG.wig  
WGBS-trb123-Rep1\_CHG.wig  
WGBS-trb123-Rep2\_CHG.wig  
WGBS-Col0-Rep1\_CHH.wig  
WGBS-Col0-Rep2\_CHH.wig  
WGBS-trb123-Rep1\_CHH.wig  
WGBS-trb123-Rep2\_CHH.wig  
BS-PCR-seq-TRB1-ZF-Rep1\_steve\_methratio.txt  
BS-PCR-seq-TRB2-ZF-Rep1\_steve\_methratio.txt  
BS-PCR-seq-TRB3-ZF-Rep1\_steve\_methratio.txt  
BS-PCRseq-Col0-Rep1\_steve\_methratio.txt  
BS-PCRseq-Col0-Rep2\_steve\_methratio.txt  
BS-PCRseq-fwa-Rep1\_steve\_methratio.txt  
BS-PCRseq-fwa-Rep2\_steve\_methratio.txt  
BS-PCRseq-TRB1-ZF-Rep2\_steve\_methratio.txt  
BS-PCRseq-TRB2-ZF-Rep2\_steve\_methratio.txt  
BS-PCRseq-TRB3-ZF-Rep2\_steve\_methratio.txt  
BS-PCR-seq-TRB1-ZF-Rep1\_steve\_methratio\_type.txt  
BS-PCR-seq-TRB2-ZF-Rep1\_steve\_methratio\_type.txt  
BS-PCR-seq-TRB3-ZF-Rep1\_steve\_methratio\_type.txt  
BS-PCRseq-Col0-Rep1\_steve\_methratio\_type.txt  
BS-PCRseq-Col0-Rep2\_steve\_methratio\_type.txt  
BS-PCRseq-fwa-Rep1\_steve\_methratio\_type.txt  
BS-PCRseq-fwa-Rep2\_steve\_methratio\_type.txt  
BS-PCRseq-TRB1-ZF-Rep2\_steve\_methratio\_type.txt  
BS-PCRseq-TRB2-ZF-Rep2\_steve\_methratio\_type.txt  
BS-PCRseq-TRB3-ZF-Rep2\_steve\_methratio\_type.txt  
RNAseq-fwa-Rep1.fastq.gz  
RNAseq-fwa-Rep2.fastq.gz  
RNAseq-fwa-Rep3.fastq.gz  
RNAseq-TRB1-ZF-Rep1.fastq.gz  
RNAseq-TRB1-ZF-Rep2.fastq.gz  
RNAseq-TRB2-ZF-Rep1.fastq.gz  
RNAseq-TRB2-ZF-Rep2.fastq.gz  
RNAseq-TRB2-ZF-Rep3.fastq.gz

RNAseq-TRB3-ZF-Rep1.fastq.gz  
RNAseq-TRB3-ZF-Rep2.fastq.gz  
RNAseq-TRB3-ZF-Rep3.fastq.gz  
FLAG-ChIPseq-TRB1-Rep1.fastq.gz  
FLAG-ChIPseq-TRB1-Rep2.fastq.gz  
FLAG-ChIPseq-TRB2-Rep1.fastq.gz  
FLAG-ChIPseq-TRB2-Rep2.fastq.gz  
FLAG-ChIPseq-TRB3-Rep1.fastq.gz  
FLAG-ChIPseq-TRB3-Rep2.fastq.gz  
WGBS-Col0-Rep1\_S9\_L001\_R1\_001.fastq.gz  
WGBS-Col0-Rep2\_S4\_L001\_R1\_001.fastq.gz  
WGBS-trb123-Rep1\_S5\_L001\_R1\_001.fastq.gz  
WGBS-trb123-Rep2\_S10\_L001\_R1\_001.fastq.gz  
BS-PCRseq-Col0-Rep2.fastq.gz  
BS-PCRseq-fwa-Rep2.fastq.gz  
BS-PCRseq-TRB1-ZF-Rep2.fastq.gz  
BS-PCRseq-TRB2-ZF-Rep2.fastq.gz  
BS-PCRseq-TRB3-ZF-Rep2.fastq.gz  
BS-PCR-seq-TRB1-ZF-Rep1\_S16\_L001\_R1\_001.fastq.gz  
BS-PCR-seq-TRB2-ZF-Rep1\_S17\_L001\_R1\_001.fastq.gz  
BS-PCR-seq-TRB3-ZF-Rep1\_S18\_L001\_R1\_001.fastq.gz  
BS-PCRseq-Col0-Rep1\_S14\_L001\_R1\_001.fastq.gz  
BS-PCRseq-fwa-Rep1\_S13\_L001\_R1\_001.fastq.gz  
RNAseq-Col0-Rep1\_S1\_L002\_R1\_001.fastq.gz  
RNAseq-Col0-Rep2\_S4\_L002\_R1\_001.fastq.gz  
RNAseq-Col0-Rep3\_S2\_L002\_R1\_001.fastq.gz  
RNAseq-jmj14-Rep1\_S12\_L002\_R1\_001.fastq.gz  
RNAseq-jmj14-Rep2\_S5\_L002\_R1\_001.fastq.gz  
RNAseq-jmj14-Rep3\_S3\_L002\_R1\_001.fastq.gz  
RNAseq-trb123-Rep1\_S11\_L002\_R1\_001.fastq.gz  
RNAseq-trb123-Rep2\_S17\_L002\_R1\_001.fastq.gz  
RNAseq-trb123-Rep3\_S18\_L002\_R1\_001.fastq.gz  
H3-ChIPseq-Col0-Rep2\_S17\_L002\_R1\_001.fastq.gz  
H3-ChIPseq-trb123-Rep2\_S16\_L002\_R1\_001.fastq.gz  
H3K4me3-ChIPseq-Col0-Rep2\_S20\_L002\_R1\_001.fastq.gz  
H3K4me3-ChIPseq-trb123-Rep2\_S19\_L002\_R1\_001.fastq.gz  
H3-ChIPseq-jmj14\_S11\_L002\_R1\_001.fastq.gz  
H3K4me3-ChIPseq-Col0\_S18\_L002\_R1\_001.fastq.gz  
H3K4me3-ChIPseq-jmj14\_S20\_L002\_R1\_001.fastq.gz  
H3K4me3-ChIPseq-trb123\_S19\_L002\_R1\_001.fastq.gz  
FLAG-ChIPseq-Col0-Rep1\_S4\_L001\_R1\_001.fastq.gz  
FLAG-ChIPseq-Col0-Rep2\_S2\_L001\_R1\_001.fastq.gz  
FLAG-ChIPseq-JMJ14-Rep1\_S6\_L001\_R1\_001.fastq.gz  
FLAG-ChIPseq-JMJ14-Rep2\_S7\_L001\_R1\_001.fastq.gz  
H3-ChIPseq-Col0-Rep1\_S17\_L004\_R1\_001.fastq.gz  
H3-ChIPseq-Col0-Rep2\_S15\_L004\_R1\_001.fastq.gz  
H3-ChIPseq-trb123-Rep1\_S20\_L004\_R1\_001.fastq.gz  
H3-ChIPseq-trb123-Rep2\_S19\_L004\_R1\_001.fastq.gz  
H3K27me3-ChIPseq-Col0-Rep1\_S38\_L004\_R1\_001.fastq.gz  
H3K27me3-ChIPseq-Col0-Rep2\_S34\_L004\_R1\_001.fastq.gz  
H3K27me3-ChIPseq-trb123-Rep1\_S37\_L004\_R1\_001.fastq.gz  
H3K27me3-ChIPseq-trb123-Rep2\_S35\_L004\_R1\_001.fastq.gz  
H3-ChIPseq-fwa-Rep2\_L003\_R2\_001.fastq.gz  
H3-ChIPseq-TRB1-ZF-Rep2\_S30\_L003\_R1\_001.fastq.gz  
H3-ChIPseq-TRB2-ZF-Rep2\_S18\_L003\_R1\_001.fastq.gz  
H3-ChIPseq-TRB3-ZF-Rep2\_S21\_L003\_R1\_001.fastq.gz  
H3K27me3-ChIPseq-fwa-Rep2\_S50\_L003\_R1\_001.fastq.gz  
H3K27me3-ChIPseq-TRB1-ZF-Rep2\_S53\_L003\_R1\_001.fastq.gz  
H3K27me3-ChIPseq-TRB2-ZF-Rep2\_S75\_L003\_R1\_001.fastq.gz  
H3K27me3-ChIPseq-TRB3-ZF-Rep2\_S89\_L003\_R1\_001.fastq.gz  
H3K4me3-ChIPseq-fwa-Rep2\_S45\_L003\_R1\_001.fastq.gz  
H3K4me3-ChIPseq-TRB1-ZF-Rep2\_S84\_L003\_R1\_001.fastq.gz  
H3K4me3-ChIPseq-TRB2-ZF-Rep2\_S82\_L003\_R1\_001.fastq.gz  
H3K4me3-ChIPseq-TRB3-ZF-Rep2\_S81\_L003\_R1\_001.fastq.gz  
H3-ChIPseq-fwa-Rep1\_S8\_L001\_R1\_001.fastq.gz  
H3-ChIPseq-fwa-Rep3\_S13\_L004\_R1\_001.fastq.gz  
H3-ChIPseq-TRB1-ZF-Rep1\_S5\_L001\_R1\_001.fastq.gz  
H3-ChIPseq-TRB1-ZF-Rep3\_S14\_L004\_R1\_001.fastq.gz

H3-ChIPseq-TRB2-ZF-Rep1\_S4\_L001\_R1\_001.fastq.gz  
H3-ChIPseq-TRB3-ZF-Rep1\_S1\_L001\_R1\_001.fastq.gz  
H3K27me3-ChIPseq-fwa-Rep1\_S18\_L001\_R1\_001.fastq.gz  
H3K27me3-ChIPseq-TRB1-ZF-Rep1\_S23\_L001\_R1\_001.fastq.gz  
H3K27me3-ChIPseq-TRB2-ZF-Rep1\_S21\_L001\_R1\_001.fastq.gz  
H3K27me3-ChIPseq-TRB3-ZF-Rep1\_S22\_L001\_R1\_001.fastq.gz  
H3K4me3-ChIPseq-fwa-Rep1\_S11\_L001\_R1\_001.fastq.gz  
H3K4me3-ChIPseq-fwa-Rep3\_S15\_L004\_R1\_001.fastq.gz  
H3K4me3-ChIPseq-TRB1-ZF-Rep1\_S17\_L001\_R1\_001.fastq.gz  
H3K4me3-ChIPseq-TRB1-ZF-Rep3\_S16\_L004\_R1\_001.fastq.gz  
H3K4me3-ChIPseq-TRB2-ZF-Rep1\_S13\_L001\_R1\_001.fastq.gz  
H3K4me3-ChIPseq-TRB3-ZF-Rep1\_S14\_L001\_R1\_001.fastq.gz  
BS-PCR-seq-TRB1-ZF-Rep1\_S16\_L001\_R2\_001.fastq.gz  
BS-PCR-seq-TRB2-ZF-Rep1\_S17\_L001\_R2\_001.fastq.gz  
BS-PCR-seq-TRB3-ZF-Rep1\_S18\_L001\_R2\_001.fastq.gz  
BS-PCRseq-Col0-Rep1\_S14\_L001\_R2\_001.fastq.gz  
BS-PCRseq-fwa-Rep1\_S13\_L001\_R2\_001.fastq.gz  
RNAseq-Col0-Rep1\_S1\_L002\_R2\_001.fastq.gz  
RNAseq-Col0-Rep2\_S4\_L002\_R2\_001.fastq.gz  
RNAseq-Col0-Rep3\_S2\_L002\_R2\_001.fastq.gz  
RNAseq-jmj14-Rep1\_S12\_L002\_R2\_001.fastq.gz  
RNAseq-jmj14-Rep2\_S5\_L002\_R2\_001.fastq.gz  
RNAseq-jmj14-Rep3\_S3\_L002\_R2\_001.fastq.gz  
RNAseq-trb123-Rep1\_S11\_L002\_R2\_001.fastq.gz  
RNAseq-trb123-Rep2\_S17\_L002\_R2\_001.fastq.gz  
RNAseq-trb123-Rep3\_S18\_L002\_R2\_001.fastq.gz  
H3-ChIPseq-Col0-Rep2\_S17\_L002\_R2\_001.fastq.gz  
H3-ChIPseq-trb123-Rep2\_S16\_L002\_R2\_001.fastq.gz  
H3K4me3-ChIPseq-Col0-Rep2\_S20\_L002\_R2\_001.fastq.gz  
H3K4me3-ChIPseq-trb123-Rep2\_S19\_L002\_R2\_001.fastq.gz  
H3-ChIPseq-jmj14\_S11\_L002\_R2\_001.fastq.gz  
H3K4me3-ChIPseq-Col0\_S18\_L002\_R2\_001.fastq.gz  
H3K4me3-ChIPseq-jmj14\_S20\_L002\_R2\_001.fastq.gz  
H3K4me3-ChIPseq-trb123\_S19\_L002\_R2\_001.fastq.gz  
FLAG-ChIPseq-Col0-Rep1\_S4\_L001\_R2\_001.fastq.gz  
FLAG-ChIPseq-Col0-Rep2\_S2\_L001\_R2\_001.fastq.gz  
FLAG-ChIPseq-JMJ14-Rep1\_S6\_L001\_R2\_001.fastq.gz  
FLAG-ChIPseq-JMJ14-Rep2\_S7\_L001\_R2\_001.fastq.gz  
H3-ChIPseq-Col0-Rep1\_S17\_L004\_R2\_001.fastq.gz  
H3-ChIPseq-Col0-Rep2\_S15\_L004\_R2\_001.fastq.gz  
H3-ChIPseq-trb123-Rep1\_S20\_L004\_R2\_001.fastq.gz  
H3-ChIPseq-trb123-Rep2\_S19\_L004\_R2\_001.fastq.gz  
H3K27me3-ChIPseq-Col0-Rep1\_S38\_L004\_R2\_001.fastq.gz  
H3K27me3-ChIPseq-Col0-Rep2\_S34\_L004\_R2\_001.fastq.gz  
H3K27me3-ChIPseq-trb123-Rep1\_S37\_L004\_R2\_001.fastq.gz  
H3K27me3-ChIPseq-trb123-Rep2\_S35\_L004\_R2\_001.fastq.gz  
H3-ChIPseq-fwa-Rep2\_S32\_L003\_R1\_001.fastq.gz  
H3-ChIPseq-TRB1-ZF-Rep2\_S30\_L003\_R2\_001.fastq.gz  
H3-ChIPseq-TRB2-ZF-Rep2\_S18\_L003\_R2\_001.fastq.gz  
H3-ChIPseq-TRB3-ZF-Rep2\_S21\_L003\_R2\_001.fastq.gz  
H3K27me3-ChIPseq-fwa-Rep2\_S50\_L003\_R2\_001.fastq.gz  
H3K27me3-ChIPseq-TRB1-ZF-Rep2\_S53\_L003\_R2\_001.fastq.gz  
H3K27me3-ChIPseq-TRB2-ZF-Rep2\_S75\_L003\_R2\_001.fastq.gz  
H3K27me3-ChIPseq-TRB3-ZF-Rep2\_S89\_L003\_R2\_001.fastq.gz  
H3K4me3-ChIPseq-fwa-Rep2\_S45\_L003\_R2\_001.fastq.gz  
H3K4me3-ChIPseq-TRB1-ZF-Rep2\_S84\_L003\_R2\_001.fastq.gz  
H3K4me3-ChIPseq-TRB2-ZF-Rep2\_S82\_L003\_R2\_001.fastq.gz  
H3K4me3-ChIPseq-TRB3-ZF-Rep2\_S81\_L003\_R2\_001.fastq.gz  
H3-ChIPseq-fwa-Rep1\_S8\_L001\_R2\_001.fastq.gz  
H3-ChIPseq-fwa-Rep3\_S13\_L004\_R2\_001.fastq.gz  
H3-ChIPseq-TRB1-ZF-Rep1\_S5\_L001\_R2\_001.fastq.gz  
H3-ChIPseq-TRB1-ZF-Rep3\_S14\_L004\_R2\_001.fastq.gz  
H3-ChIPseq-TRB2-ZF-Rep1\_S4\_L001\_R2\_001.fastq.gz  
H3-ChIPseq-TRB3-ZF-Rep1\_S1\_L001\_R2\_001.fastq.gz  
H3K27me3-ChIPseq-fwa-Rep1\_S18\_L001\_R2\_001.fastq.gz  
H3K27me3-ChIPseq-TRB1-ZF-Rep1\_S23\_L001\_R2\_001.fastq.gz  
H3K27me3-ChIPseq-TRB2-ZF-Rep1\_S21\_L001\_R2\_001.fastq.gz  
H3K27me3-ChIPseq-TRB3-ZF-Rep1\_S22\_L001\_R2\_001.fastq.gz

H3K4me3-ChIPseq-fwa-Rep1\_S11\_L001\_R2\_001.fastq.gz  
 H3K4me3-ChIPseq-fwa-Rep3\_S15\_L004\_R2\_001.fastq.gz  
 H3K4me3-ChIPseq-TRB1-ZF-Rep1\_S17\_L001\_R2\_001.fastq.gz  
 H3K4me3-ChIPseq-TRB1-ZF-Rep3\_S16\_L004\_R2\_001.fastq.gz  
 H3K4me3-ChIPseq-TRB2-ZF-Rep1\_S13\_L001\_R2\_001.fastq.gz  
 H3K4me3-ChIPseq-TRB3-ZF-Rep1\_S14\_L001\_R2\_001.fastq.gz  
 FLAG-Col-0-Rep3\_R1\_001.fastq.gz  
 FLAG-Col-0-Rep3\_R2\_001.fastq.gz  
 FLAG-Col-0-Rep4\_R1\_001.fastq.gz  
 FLAG-Col-0-Rep4\_R2\_001.fastq.gz  
 FLAG-TRB1-rep3\_R1\_001.fastq.gz  
 FLAG-TRB1-rep3\_R2\_001.fastq.gz  
 FLAG-TRB1-rep4\_R1\_001.fastq.gz  
 FLAG-TRB1-rep4\_R2\_001.fastq.gz  
 FLAG-TRB2-rep3\_R1\_001.fastq.gz  
 FLAG-TRB2-rep3\_R2\_001.fastq.gz  
 FLAG-TRB2-rep4\_R1\_001.fastq.gz  
 FLAG-TRB2-rep4\_R2\_001.fastq.gz  
 FLAG-TRB3-rep3\_R1\_001.fastq.gz  
 FLAG-TRB3-rep3\_R2\_001.fastq.gz  
 FLAG-TRB3-rep4\_R1\_001.fastq.gz  
 FLAG-TRB3-rep4\_R2\_001.fastq.gz  
 MYC-Col-0\_S13\_L003\_R1\_001.fastq.gz  
 MYC-Col-0\_S13\_L003\_R2\_001.fastq.gz  
 MYC-JMJ14-ZF-TRB1\_S15\_L003\_R1\_001.fastq.gz  
 MYC-JMJ14-ZF-TRB1\_S15\_L003\_R2\_001.fastq.gz  
 MYC-JMJ14-ZF-TRB1\_S18\_L003\_R1\_001.fastq.gz  
 MYC-JMJ14-ZF-TRB1\_S18\_L003\_R2\_001.fastq.gz  
 MYC-JMJ14-ZF-TRB2\_S16\_L003\_R1\_001.fastq.gz  
 MYC-JMJ14-ZF-TRB2\_S16\_L003\_R2\_001.fastq.gz  
 MYC-JMJ14-ZF-TRB3\_S17\_L003\_R1\_001.fastq.gz  
 MYC-JMJ14-ZF-TRB3\_S17\_L003\_R2\_001.fastq.gz  
 MYC-JMJ14\_S14\_L003\_R1\_001.fastq.gz  
 MYC-JMJ14\_S14\_L003\_R2\_001.fastq.gz  
 input-Col-0\_S23\_L003\_R1\_001.fastq.gz  
 input-Col-0\_S23\_L003\_R2\_001.fastq.gz  
 input-JMJ14-ZF-TRB1\_S25\_L003\_R1\_001.fastq.gz  
 input-JMJ14-ZF-TRB1\_S25\_L003\_R2\_001.fastq.gz  
 input-JMJ14-ZF-TRB1\_S28\_L003\_R1\_001.fastq.gz  
 input-JMJ14-ZF-TRB1\_S28\_L003\_R2\_001.fastq.gz  
 input-JMJ14-ZF-TRB2\_S26\_L003\_R1\_001.fastq.gz  
 input-JMJ14-ZF-TRB2\_S26\_L003\_R2\_001.fastq.gz  
 input-JMJ14-ZF-TRB3\_S27\_L003\_R1\_001.fastq.gz  
 input-JMJ14-ZF-TRB3\_S27\_L003\_R2\_001.fastq.gz  
 input-JMJ14\_S24\_L003\_R1\_001.fastq.gz  
 input-JMJ14\_S24\_L003\_R2\_001.fastq.gz

Genome browser session  
 (e.g. [UCSC](#))

Available at GEO

## Methodology

Replicates

Two replicates for ChIP-seq. Three replicates for RNA-seq samples. Two replicates for WGBS data. Two replicates for BS-PCR.

Sequencing depth

| Name                             | Total_reads | Unique_reads | Reads_length | Reads_type |
|----------------------------------|-------------|--------------|--------------|------------|
| FLAG-ChIPseq-Col0-Rep1_S4_L001   | 55575677    | 45953411     | 50           | PE         |
| FLAG-ChIPseq-Col0-Rep2_S2_L001   | 55410005    | 47067741     | 50           | PE         |
| FLAG-ChIPseq-JMJ14-Rep1_S6_L001  | 53163491    | 46194604     | 50           | PE         |
| FLAG-ChIPseq-JMJ14-Rep2_S7_L001  | 51456477    | 43688143     | 50           | PE         |
| H3-ChIPseq-Col0-Rep1_S17_L004    | 56310307    | 41614613     | 50           | PE         |
| H3-ChIPseq-Col0-Rep2_S15_L004    | 60183339    | 44979043     | 50           | PE         |
| H3-ChIPseq-Col0-Rep2_S17_L002    | 17169970    | 15553287     | 50           | PE         |
| H3-ChIPseq-Col0_S9_L002          | 37848924    | 35107648     | 50           | PE         |
| H3-ChIPseq-fwa-Rep1_S32_L003     | 31559024    | 27057347     | 50           | PE         |
| H3-ChIPseq-fwa-Rep1_S8_L001      | 22025700    | 20443743     | 50           | PE         |
| H3-ChIPseq-fwa-Rep2_S22_L003     | 34615984    | 29849162     | 50           | PE         |
| H3-ChIPseq-jmj14_S11_L002        | 31019042    | 27343550     | 50           | PE         |
| H3-ChIPseq-TRB1-ZF-Rep1_S29_L003 | 32068889    | 27497183     | 50           | PE         |

H3-ChIPseq-TRB1-ZF-Rep1\_S5\_L001 23164852 21784542 50 PE  
 H3-ChIPseq-TRB1-ZF-Rep2\_S30\_L003 32058861 26393272 50 PE  
 H3-ChIPseq-trb123-Rep1\_S20\_L004 52681115 39041971 50 PE  
 H3-ChIPseq-trb123-Rep2\_S16\_L002 17534844 15583606 50 PE  
 H3-ChIPseq-trb123-Rep2\_S19\_L004 54288481 39544914 50 PE  
 H3-ChIPseq-trb123\_S10\_L002 34173266 31179943 50 PE  
 H3-ChIPseq-TRB2-ZF-Rep1\_S31\_L003 31812241 27598799 50 PE  
 H3-ChIPseq-TRB2-ZF-Rep1\_S4\_L001 24143133 22618113 50 PE  
 H3-ChIPseq-TRB2-ZF-Rep2\_S18\_L003 35155705 30874154 50 PE  
 H3-ChIPseq-TRB3-ZF-Rep1\_S15\_L003 42327677 37272648 50 PE  
 H3-ChIPseq-TRB3-ZF-Rep1\_S1\_L001 47498433 44531332 50 PE  
 H3-ChIPseq-TRB3-ZF-Rep2\_S21\_L003 34627333 29189300 50 PE  
 H3K27me3-ChIPseq-Col0-Rep1\_S38\_L004 35701023 24790314 50 PE  
 H3K27me3-ChIPseq-Col0-Rep2\_S34\_L004 41264013 29057697 50 PE  
 H3K27me3-ChIPseq-fwa-Rep1\_S18\_L001 12199070 11197483 50 PE  
 H3K27me3-ChIPseq-fwa-Rep1\_S50\_L003 23720150 19302200 50 PE  
 H3K27me3-ChIPseq-fwa-Rep2\_S48\_L003 24850552 19542262 50 PE  
 H3K27me3-ChIPseq-TRB1-ZF-Rep1\_S23\_L001 10667079 9917509 50 PE  
 H3K27me3-ChIPseq-TRB1-ZF-Rep1\_S51\_L003 23457045 18554823 50 PE  
 H3K27me3-ChIPseq-TRB1-ZF-Rep2\_S53\_L003 23019570 16957584 50 PE  
 H3K27me3-ChIPseq-trb123-Rep1\_S37\_L004 38883467 22939207 50 PE  
 H3K27me3-ChIPseq-trb123-Rep2\_S35\_L004 41241913 24042944 50 PE  
 H3K27me3-ChIPseq-TRB2-ZF-Rep1\_S21\_L001 10871814 9971853 50 PE  
 H3K27me3-ChIPseq-TRB2-ZF-Rep1\_S71\_L003 19099123 15283203 50 PE  
 H3K27me3-ChIPseq-TRB2-ZF-Rep2\_S75\_L003 18850368 12894861 50 PE  
 H3K27me3-ChIPseq-TRB3-ZF-Rep1\_S22\_L001 10819520 9975556 50 PE  
 H3K27me3-ChIPseq-TRB3-ZF-Rep1\_S69\_L003 19603897 15788879 50 PE  
 H3K27me3-ChIPseq-TRB3-ZF-Rep2\_S89\_L003 15442987 11743192 50 PE  
 H3K4me3-ChIPseq-Col0-Rep2\_S20\_L002 7074726 6173219 50 PE  
 H3K4me3-ChIPseq-Col0\_S18\_L002 30886642 27767146 50 PE  
 H3K4me3-ChIPseq-fwa-Rep1\_S11\_L001 17925369 16471918 50 PE  
 H3K4me3-ChIPseq-fwa-Rep1\_S45\_L003 26780511 22388582 50 PE  
 H3K4me3-ChIPseq-fwa-Rep2\_S55\_L003 22285816 17327546 50 PE  
 H3K4me3-ChIPseq-jmj14\_S20\_L002 27315172 23471069 50 PE  
 H3K4me3-ChIPseq-TRB1-ZF-Rep1\_S17\_L001 14752705 13237462 50 PE  
 H3K4me3-ChIPseq-TRB1-ZF-Rep1\_S66\_L003 20179690 16032270 50 PE  
 H3K4me3-ChIPseq-TRB1-ZF-Rep2\_S84\_L003 17038554 13335630 50 PE  
 H3K4me3-ChIPseq-trb123-Rep2\_S19\_L002 7676034 6723712 50 PE  
 H3K4me3-ChIPseq-trb123\_S19\_L002 27815135 24913917 50 PE  
 H3K4me3-ChIPseq-TRB2-ZF-Rep1\_S13\_L001 16000826 14861136 50 PE  
 H3K4me3-ChIPseq-TRB2-ZF-Rep1\_S64\_L003 20441881 16113650 50 PE  
 H3K4me3-ChIPseq-TRB2-ZF-Rep2\_S82\_L003 17538792 14787028 50 PE  
 H3K4me3-ChIPseq-TRB3-ZF-Rep1\_S58\_L003 22087670 18985369 50 PE  
 H3K4me3-ChIPseq-TRB3-ZF-Rep2\_S81\_L003 17580777 13033157 50 PE  
 H3K4me3-ChIPseq-TRB3-ZF\_S14\_L001 15987241 14814174 50 PE  
 FLAG ChIPseq Col0 Rep3 46771421 40100716 50 PE  
 FLAG ChIPseq Col0 Rep4 54934418 47809577 50 PE  
 FLAG ChIPseq TRB1 Rep 3 78667086 64173722 50 PE  
 FLAG ChIPseq TRB1 Rep 4 73527414 65109334 50 PE  
 FLAG ChIPseq TRB2 Rep 3 53241188 46236940 50 PE  
 FLAG ChIPseq TRB2 Rep 4 63153116 54914060 50 PE  
 FLAG ChIPseq TRB3 Rep 3 69019576 63199575 50 PE  
 FLAG ChIPseq TRB3 Rep 4 66253935 60388459 50 PE  
 Myc ChIPseq Col-0 93394114 33138911 50 PE  
 Myc ChIPseq JMJ14 55117705 30215610 50 PE  
 Myc ChIPseq JMJ14 in TRB1-ZF Rep1 43320387 22634743 50 PE  
 Myc ChIPseq JMJ14 in TRB1-ZF Rep2 76549695 46064156 50 PE  
 Myc ChIPseq JMJ14 in TRB2-ZF 41796529 22959777 50 PE  
 Myc ChIPseq JMJ14 in TRB3-ZF 28828824 13271033 50 PE  
 Input Col-0 84839846 66006607 50 PE  
 Input JMJ14 35905417 27954905 50 PE  
 Input JMJ14 in TRB1-ZF Rep1 67743003 51733393 50 PE  
 Input JMJ14 in TRB1-ZF Rep2 84076083 63987736 50 PE  
 Input JMJ14 in TRB2-ZF 74600658 54443896 50 PE  
 Input JMJ14 in TRB3-ZF 57503254 42177382 50 PE

Antibodies

Anti-H3K27me3 (Millipore Sigma)  
 Anti-H3 (Abcam)

|                         |                                                                                                                              |
|-------------------------|------------------------------------------------------------------------------------------------------------------------------|
|                         | Anti-H3K4me3 (Millipore Sigma)<br>anti-FLAG M2 (Sigma)<br>Anti-Myc (Cell Signaling)                                          |
| Peak calling parameters | MACS2: '-f BAM -g 1.3e+8 -q 0.05 --extsize 147'                                                                              |
| Data quality            | All identified peaks in the study were called with a qual threshold of 0.01 ( FDR 1%).                                       |
| Software                | Bowtie (v1.1.2),<br>Samtools (v1.9)<br>MACS2 (v2.1.1)<br>ChIPseeker<br>deeptools (v2.5.1).<br>bedtools (v2.26.0)<br>MaxQuant |
